# Supplementary material
Source: Springer Nature journal article supplement (https://www.springermedizin.de/resource/supplementary/12880_2009_65_MOESM1_ESM.pdf/9450504)

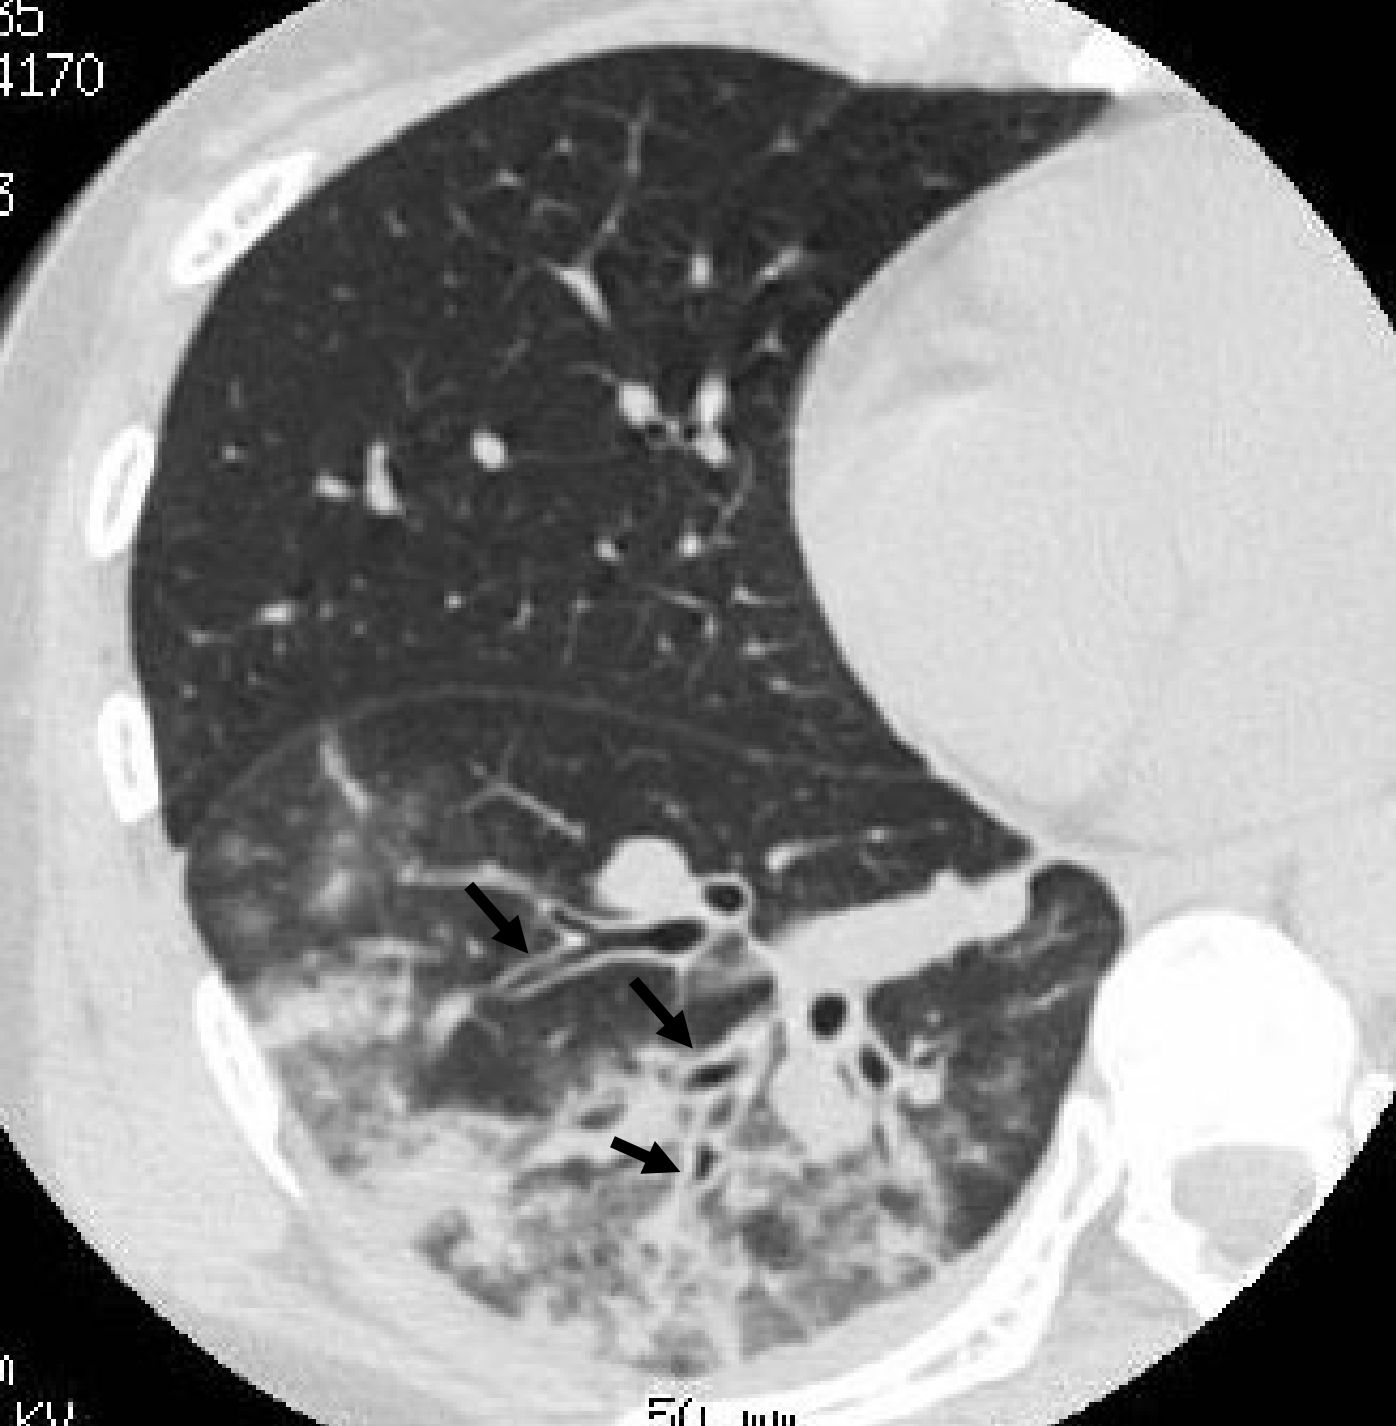

55  
4170

3

0  
KV

71 cm

Supplement: MOESM1 [file 9450504]
